# Supplementary material
Source: PubMed Central journal article supplement (PMC9933244)
Supplement: NIHMS1864232-supplement-1.pdf [file NIHMS1864232-supplement-1.pdf]

**Supplemental Table 1: Loadings for the inflammatory composites**

|               | <b>Loading</b>                   |                             |                               |
|---------------|----------------------------------|-----------------------------|-------------------------------|
|               | <b>Executive<br/>Functioning</b> | <b>Processing<br/>Speed</b> | <b>Visuospatial<br/>Skill</b> |
| <b>Hs-CRP</b> | -.699                            | -.744                       | -.619                         |
| <b>SAA</b>    | -.719                            | -.709                       | -.759                         |
| <b>ICAM1</b>  | -.135                            | -.130                       | -.161                         |
| <b>IL-6</b>   | -.210                            | -.225                       | -.157                         |
| <b>BDNF</b>   | -.123                            | -.110                       | -.157                         |

Other biomarkers that were considered but did not load significantly onto the composite: IP-10, MCP-1, IL-8, Fractalkine.
